# Supplementary material for: An insight into local environment of lanthanide ions in Sr2SiO4:Ln (Ln = Sm, Eu and Dy)
Source: Royal Society of Chemistry journal article supplement (doi:10.1039/c5nj01191d), 2015-01-01
Supplement: c5nj01191d1.pdf [file c5nj01191d1.pdf]

## Electronic Supplementary Material (ESI) for New Journal of Chemistry.

This journal is © The Royal Society of Chemistry and the Centre National de la Recherche Scientifique 2015

### An Insight into Local environment of lanthanide ions in $\text{Sr}_2\text{SiO}_4:\text{Ln}$ (Ln=Sm, Eu and Dy)

Santosh K. Gupta<sup>1\*</sup>, Sandeep Nigam<sup>2</sup>, A.K. Yadav<sup>3</sup>, M. Mohapatra<sup>1</sup>, S.N. Jha<sup>3</sup>, C. Majumder<sup>2</sup>, D. Bhattacharya<sup>3</sup>

<sup>1</sup>Radiochemistry Division, <sup>2</sup>Chemistry Division, <sup>3</sup>Atomic and molecular physics Division  
Bhabha Atomic Research Centre, Mumbai 400085, India

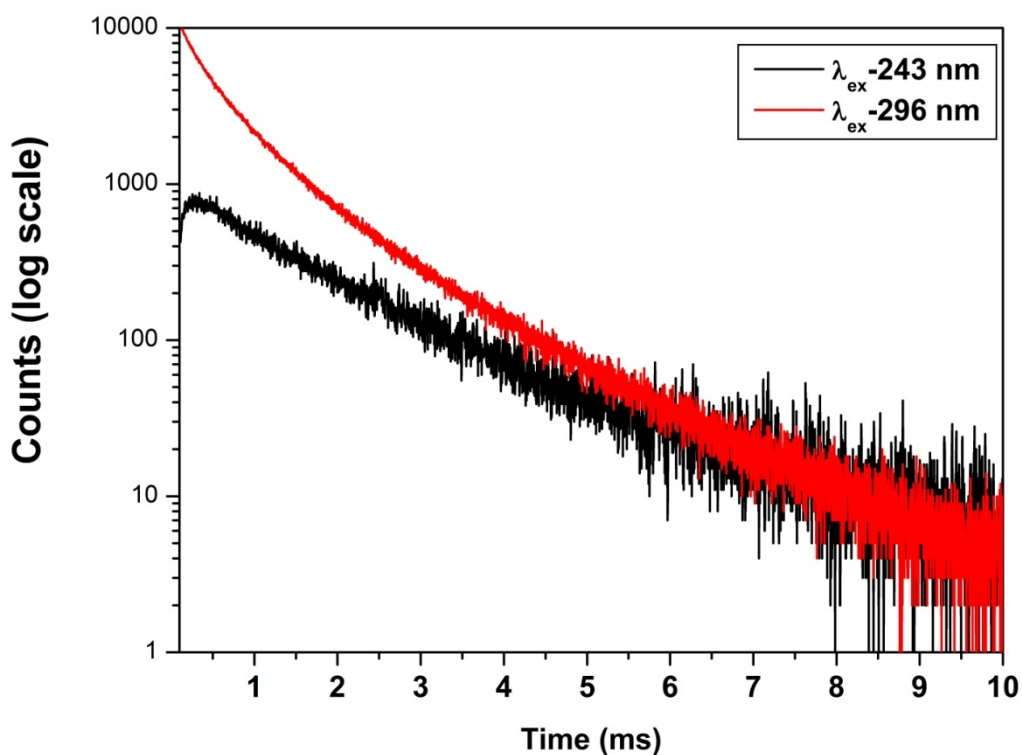

Fig. S1: Luminescence decay time profile of  $\text{Eu}^{3+}$  doped  $\text{Sr}_2\text{SiO}_4$  with  $\lambda_{\text{ex}}=243$  and 296 nm respectively.

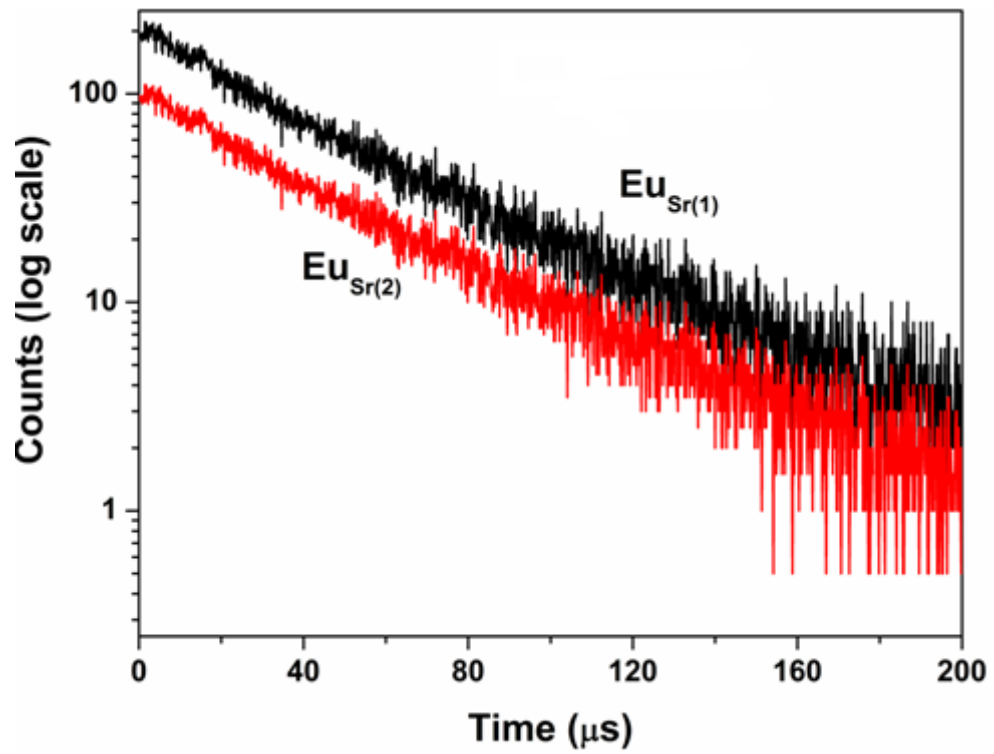

Fig. S2: Luminescence decay time profile of Sr<sub>2</sub>SiO<sub>4</sub>:Eu<sup>2+</sup> with  $\lambda_{\text{ex}}$ -340 nm under  $\lambda_{\text{em}}$  - 490 and 560 nm

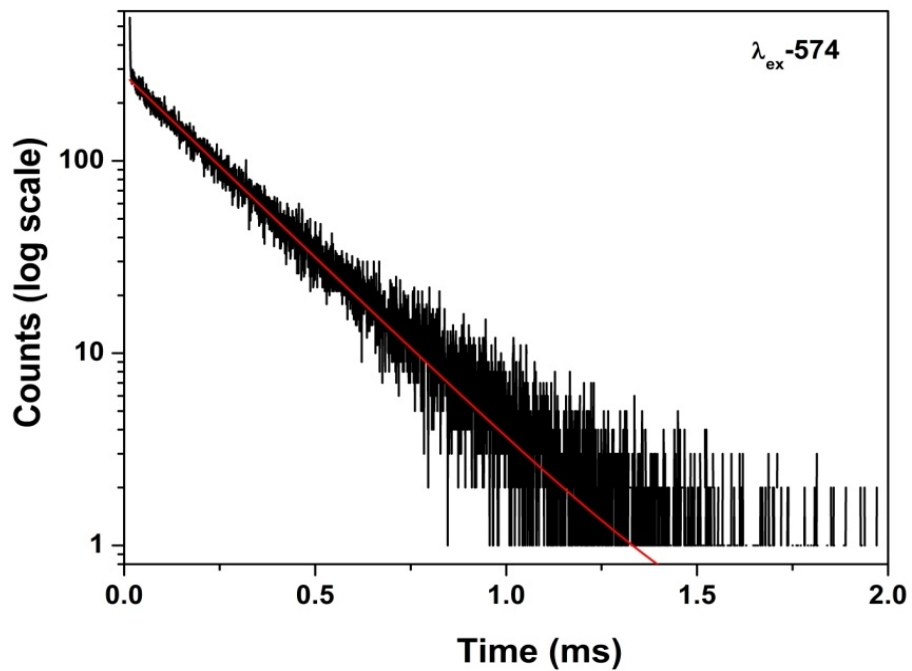

Fig. S3: PL decay curve for the Sr<sub>2</sub>SiO<sub>4</sub>:Dy<sup>3+</sup> sample. Black curve is experimentally observed decay and the red one is exponentially fit one.

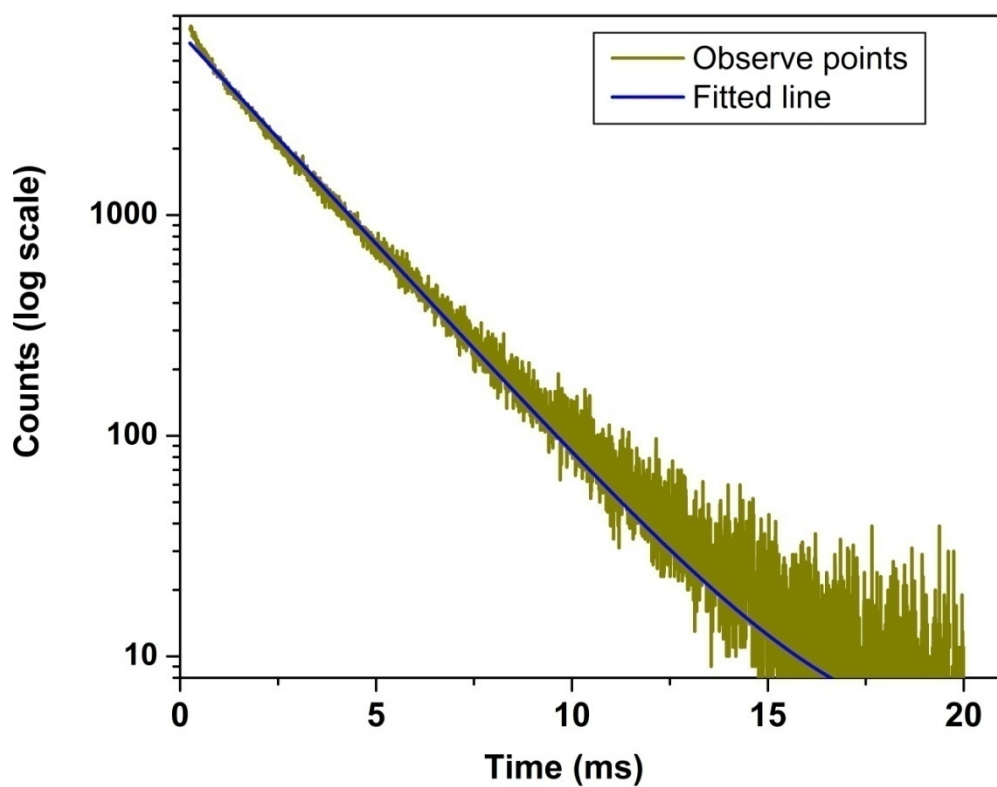

Fig. S4: PL decay curve for the  $\text{Sr}_2\text{SiO}_4:\text{Sm}^{3+}$  sample. Brown curve is experimentally observed decay and the blue one is exponentially fitted.

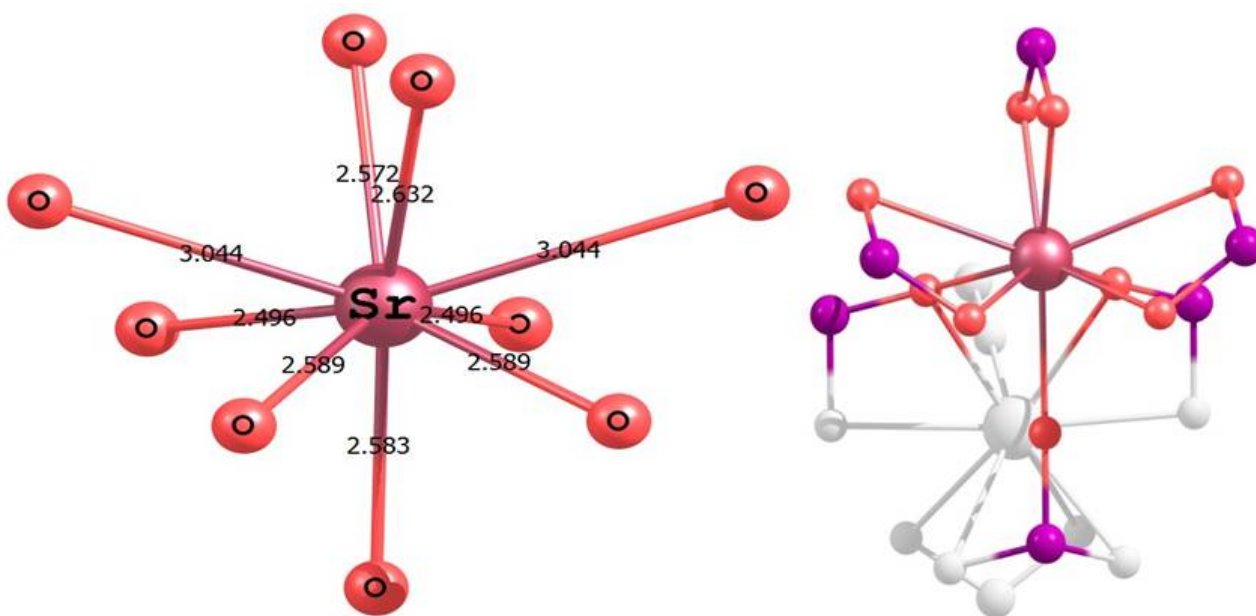

**Fig. S5: Various Sr-O bond lengths in SrO<sub>9</sub> polyhedra and their linkage in  $\alpha'$ Sr<sub>2</sub>SiO<sub>4</sub>**

**Shortest bond: 2.50 Å, largest bond: 3.04 Å, Average Sr-O bond length: 2.68 Å,  
Experimental value: 2.70 Å**

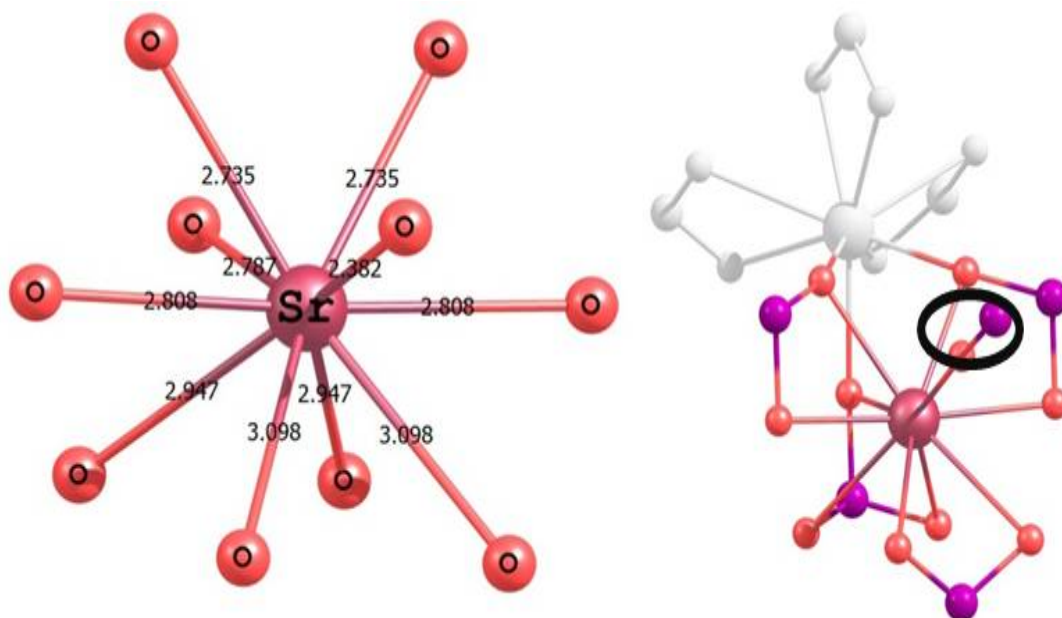

**Fig. S6: Various Sr-O bond lengths in SrO<sub>10</sub> polyhedra and their linkage in  $\alpha'$ Sr<sub>2</sub>SiO<sub>4</sub>**

**Shortest bond: 2.38 Å, largest bond: 3.10 Å, Average Sr-O bond length: 2.84 Å,  
Experimental value: 2.85 Å**

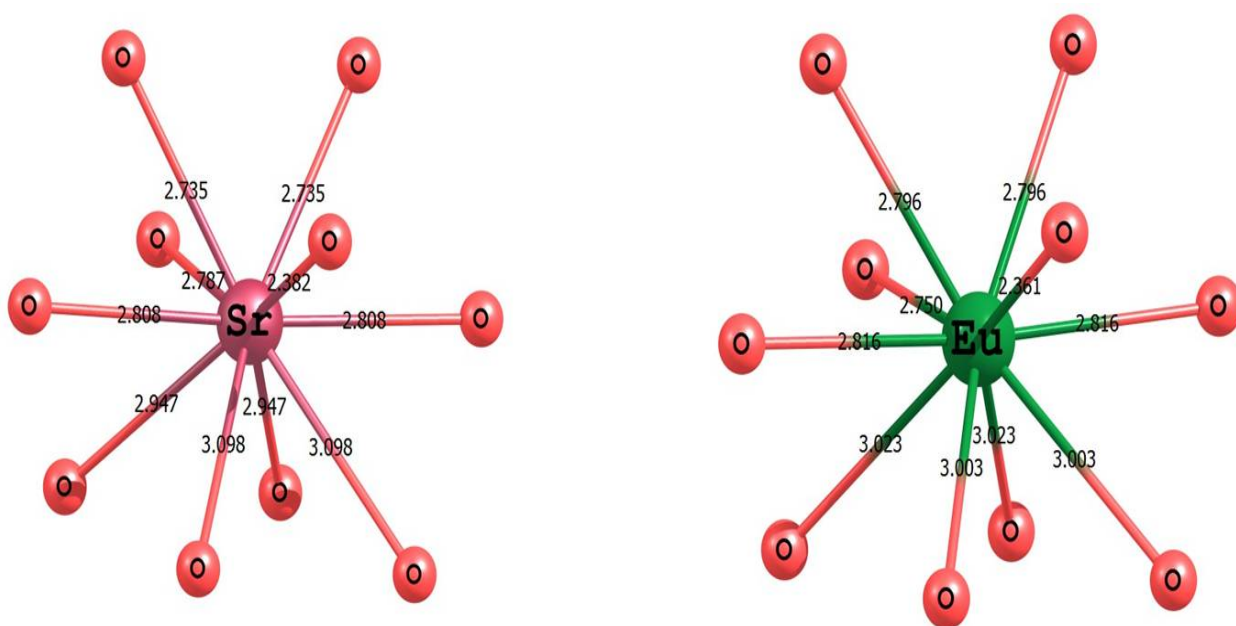

**Fig. S7: Eu incorporation at SrO<sub>10</sub> polyhedra**

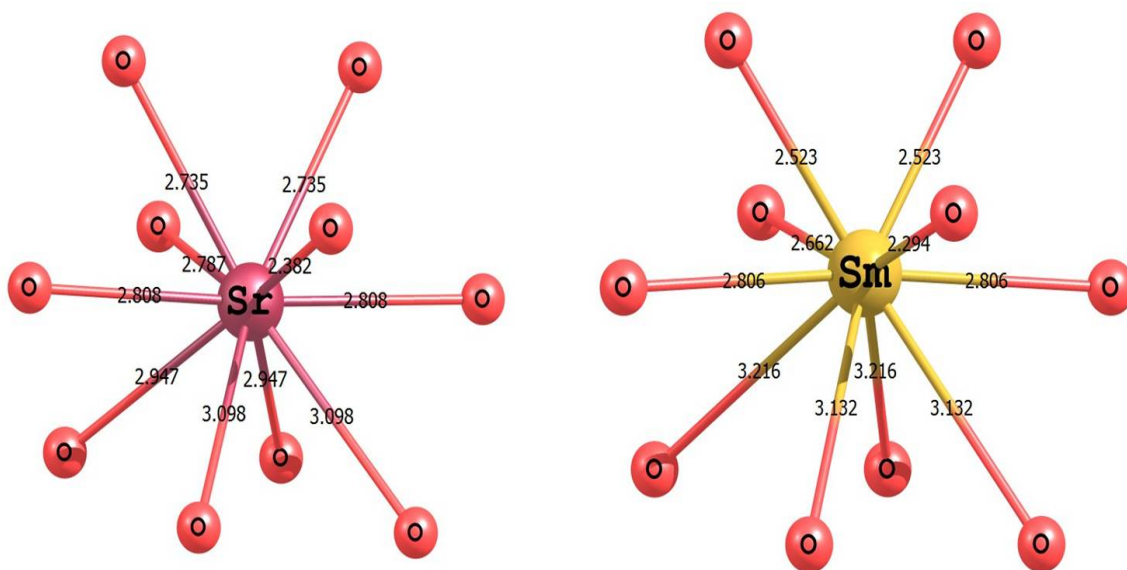

**Fig. S8: Sm incorporation at SrO<sub>10</sub> polyhedra**

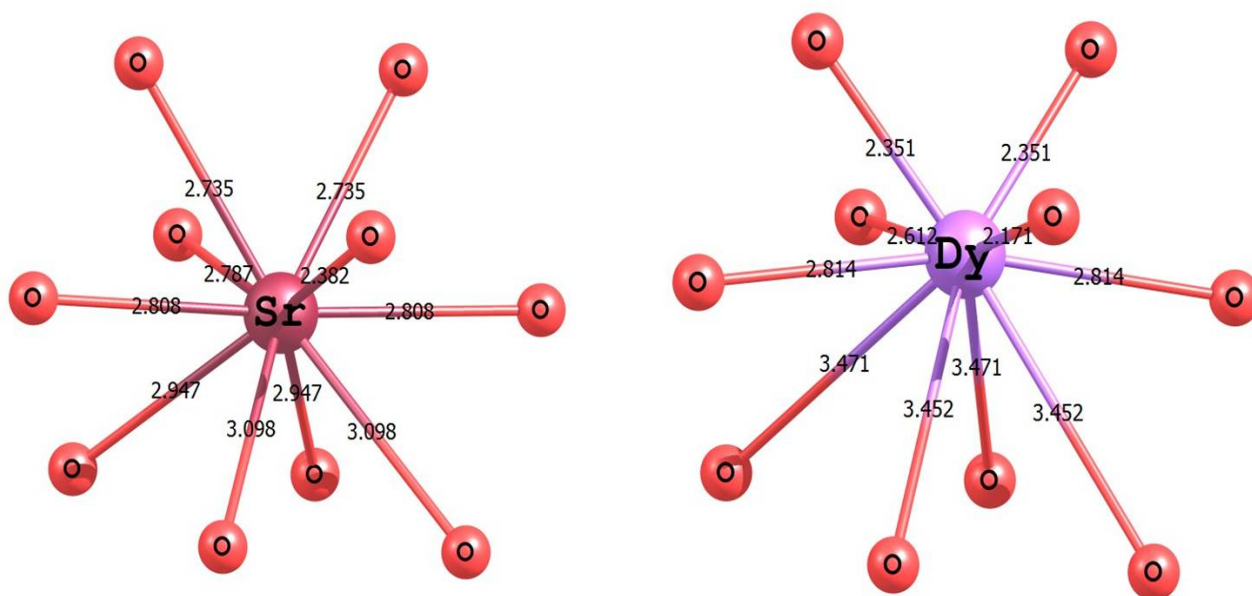

**Fig. S9: Dy incorporation at SrO<sub>10</sub> polyhedra**

**Table T1: XRD data of strontium silicate ( $\lambda= 0.15406$  nm)**

| <b>2<math>\theta</math></b> | <b>d value</b> | <b>I/I<sub>0</sub></b> | <b>h k l</b> |
|-----------------------------|----------------|------------------------|--------------|
| 27.198                      | 3.2760         | 39                     | 1 1 2        |
| 29.736                      | 3.0020         | 24                     | 2 1 0        |
| 30.241                      | 2.9530         | 17                     | 1 0 3        |
| 31.137                      | 2.8700         | 100                    | 2 1 1        |
| 31.204                      | 2.8640         | 30                     | 2 0 2        |
| 31.52                       | 2.8360         | 76                     | 0 2 0        |
| 31.738                      | 2.8170         | 92                     | 0 1 3        |
| 37.554                      | 2.3930         | 24                     | 2 0 3        |
| 38.85                       | 2.3161         | 25                     | 1 2 2        |
| 39.077                      | 2.3032         | 25                     | 1 0 4        |
| 39.249                      | 2.2935         | 44                     | 3 0 1        |
| 42.32                       | 2.1339         | 19                     | 1 1 4        |
| 44.252                      | 2.0451         | 20                     | 1 2 3        |
| 45.136                      | 2.0071         | 23                     | 2 0 4        |
| 48.413                      | 1.8786         | 18                     | 1 0 5        |
| 49.849                      | 1.8278         | 22                     | 2 2 3        |
| 51.191                      | 1.7830         | 26                     | 1 1 5        |
| 55.157                      | 1.6638         | 28                     | 4 1 1        |
| 56.281                      | 1.6332         | 21                     | 0 3 3        |
| 56.659                      | 1.6232         | 35                     | 3 1 4        |

**Table T2: Procedure data slicing in TRES**

- ❖ Supposing there are two components A (short lived) and B (long lived), first we record the composite spectrum (A+B) with very short delay (just to avoid the lamp profile).
- ❖ Then give sufficient delay and record with identical integration times so that there is only B component in the spectrum (let's say B'; A is already decayed).
- ❖ But the intensity of the B' which we would get is not the same as the original B in the composite spectrum (A+B).
- ❖ So we multiply a suitable multiplying factor (exp factor,  $e^{-t/\tau}$ ) so as to get the original intensity of B.

- ❖ Then if we subtract this B from the composite spectrum (A+B), it is possible to get the short lived component A.
- ❖ One has to maintain however same gate widths while dealing with this type of procedure.

**Table T3: Structural parameters obtained from EXAFS fitting.**

|         | Parameter       | <b>Sr<sub>2</sub>SiO<sub>4</sub></b> | <b>Sr<sub>2</sub>SiO<sub>4</sub>:Dy</b> | <b>Sr<sub>2</sub>SiO<sub>4</sub>:Eu</b> | <b>Sr<sub>2</sub>SiO<sub>4</sub>:Sm</b> |
|---------|-----------------|--------------------------------------|-----------------------------------------|-----------------------------------------|-----------------------------------------|
| Sr(1)-O | R (Å)<br>(2.38) | 2.45                                 | 2.45                                    | 2.38                                    | 2.41                                    |
|         | N (1)           | 1*0.5                                | 1*0.5                                   | 1*0.5                                   | 1*0.5                                   |
|         | $\sigma^2$      | 0.001                                | 0.001                                   | 0.002                                   | 0.001                                   |
| Sr(2)-O | R (Å)<br>(2.51) | 2.58                                 | 2.46                                    | 2.55                                    | 2.57                                    |
|         | N (2)           | 2*0.5                                | 2*0.5                                   | 2*0.5                                   | 2*0.5                                   |
|         | $\sigma^2$      | 0.001                                | 0.001                                   | 0.002                                   | 0.003                                   |
| Sr(2)-O | R (Å)<br>(2.60) | 2.58                                 | 2.56                                    | 2.57                                    | 2.58                                    |
|         | N (5)           | 5*0.5                                | 5*0.5                                   | 5*0.5                                   | 5*0.5                                   |
|         | $\sigma^2$      | 0.001                                | 0.001                                   | 0.007                                   | 0.001                                   |
| Sr(1)-O | R (Å)<br>(2.85) | 2.85                                 | 2.86                                    | 2.84                                    | 2.84                                    |
|         | N (5)           | 5*0.5                                | 5*0.5                                   | 5*0.5                                   | 5*0.5                                   |
|         | $\sigma^2$      | 0.001                                | 0.001                                   | 0.004                                   | 0.001                                   |
| Sr(1)-O | R (Å)<br>(3.07) | 3.07                                 | 3.08                                    | 3.07                                    | 3.00                                    |
|         | N (4)           | 4*0.5                                | 4*0.5                                   | 4*0.5                                   | 4*0.5                                   |
|         | $\sigma^2$      | 0.001                                | 0.001                                   | 0.0044                                  | 0.001                                   |
| Sr(2)-O | R (Å)<br>(3.11) | 3.07                                 | 3.08                                    | 3.07                                    | 2.78                                    |
|         | N (2)           | 2*0.5                                | 2*0.5                                   | 2*0.5                                   | 2*0.5                                   |
|         | $\sigma^2$      | 0.001                                | 0.001                                   | 0.006                                   | 0.004                                   |

|                                     |                 |         |       |        |        |
|-------------------------------------|-----------------|---------|-------|--------|--------|
| Sr-Si                               | R (Å)<br>(3.33) | 3.14    | 3.14  | 3.15   | 3.06   |
|                                     | N (4)           | 4*0.689 | 4*0.8 | 4*0.76 | 4*0.68 |
|                                     | $\sigma^2$      | 0.01    | 0.017 | 0.013  | 0.01   |
| Average Sr(1)-O<br>(10 Coordinated) |                 | 2.90    | 2.91  | 2.90   | 2.86   |
| Average Sr(2)-O<br>(9 Coordinated)  |                 | 2.69    | 2.65  | 2.68   | 2.62   |

**Table T4: Energetics for various lanthanides in Sr<sub>2</sub>SiO<sub>4</sub> for two different sites of Sr**

| M=<br>Sm/Dy/Eu                            | Total Energy ( eV) |                |                |
|-------------------------------------------|--------------------|----------------|----------------|
|                                           | Sm                 | Dy             | Eu             |
| M at9-<br>coordinated<br>Site             | -<br>200.64246     | -<br>200.65750 | -<br>207.56386 |
| M at10-<br>coordinated<br>Site            | -<br>200.06394     | -<br>199.93745 | -<br>207.53293 |
| Relative<br>stability<br>$\Delta E(10-9)$ | 0.57852            | 0.72005        | 0.03093        |

**Table T5: Point symmetry and local structure around Eu ion in SrO<sub>9</sub> and SrO<sub>10</sub>**

| SrO <sub>9</sub>            | SrO <sub>10</sub>                                                                                    |
|-----------------------------|------------------------------------------------------------------------------------------------------|
| symmetry: C <sub>2v</sub>   | symmetry: C <sub>3v</sub>                                                                            |
| Distorted local environment | A site distorted from perfect O <sub>h</sub> symmetry, will be a D <sub>3</sub> or C <sub>3v</sub> . |
